# Supplementary material for: Cohesin Proteins Promote Ribosomal RNA Production and Protein Translation in Yeast and Human Cells
Source: PLoS Genet. 2012 Jun 14;8(6):e1002749. doi: 10.1371/journal.pgen.1002749 (PMC3375231; doi:10.1371/journal.pgen.1002749)
Supplement: Table S2 — Strains. (XLSX) [file pgen.1002749.s007.xlsx]

## Sheet: Sheet1
Figure	Parent	Strain Name	Genotype
1, 2, 3, 4, 5	W303a	W303a	MATa ura3-1 leu2,3-112 his3-1 trp1-1 ade2-1 can1-100 Δbar1
	W303a	SG156.1	MATa ura3-1 leu2,3-112 his3-1 trp1-1 ade2-1 can1-100 Δbar1 ECO1::eco1-W216G::HYG
	W303a	SG154.2	MATa ura3-1 leu2,3-112 his3-1 trp1-1 ade2-1 can1-100 Δbar1 SCC2::scc2-D730V::HYG
	W303a	SG136.3	MATa ura3-1 leu2,3-112 his3-1 trp1-1 ade2-1 can1-100 Δbar1 SMC1::smc1-Q843D::HYG
	W303a	SG297.1	MATa ura3-1 leu2,3-112 his3-1 trp1-1 ade2-1 can1-100 Δbar1 rad61Δ::KAN
	W303a	SG272.7, SG272.8	MATa ura3-1 leu2,3-112 his3-1 trp1-1 ade2-1 can1-100 Δbar1 rad61Δ::KAN ECO1::eco1-W216G::HYG
	W303a	JG1598	MATa ura3-1 leu2,3-112 his3-1 trp1-1 ade2-1 can1-100 Δbar1 ECO1::eco1-ack::HYG
	W303a	JG1595	MATa ura3-1 leu2,3-112 his3-1 trp1-1 ade2-1 can1-100 Δbar1 ECO1::eco1-H53Y::HYG
5	W303a	NOY4081bf	MATa ade2-1 ura3-1 his3-11 trp1-1 leu2-3,112 can1-100; fob1D::HIS3
	NOY4081bf	YSI102	NOY4081bf except 20 rDNA copies
	NOY4081bf	YSI103	NOY4081bf except 40 rDNA copies
	NOY4081bf	YSI104	NOY4081bf except 80 rDNA copies
	NOY4081bf	YSI105	NOY4081bf except 110 rDNA copies
6	YSI102	YSI126	YSI102 except his3-11::GFP-LacI-HIS3 RDN1::LacO(50)-ADE2
	YSI126	BH283.1	YSI102 except his3-11::GFP-LacI-HIS3 RDN1::LacO(50)-ADE2 ECO1::eco1-W216G::HYG
	YSI105	YSI129	YSI105 except his3-11::GFP-LacI-HIS3 RDN1::LacO(50)-ADE2
	YSI129	BH284.1	YSI105 except his3-11::GFP-LacI-HIS3 RDN1::LacO(50)-ADE2 ECO1::eco1-W216G::HYG
6	W303a	LS1069	MATa ura3-1 leu2,3-112 his3-1 trp1-1 ade2-1 can1-100 Δbar1 RDN1::Probe(32)::URA3
	W303a	LS1077	MATa ura3-1 leu2,3-112 his3-1 trp1-1 ade2-1 can1-100 Δbar1 RDN1::Probe(32)::URA3 SMC1::smc1-Q843Δ::HYG
	W303a	LS1075	MATa ura3-1 leu2,3-112 his3-1 trp1-1 ade2-1 can1-100 Δbar1 RDN1::Probe(32)::URA3 ECO1::eco1-W216G::HYG
	W303a	LS1076	MATa ura3-1 leu2,3-112 his3-1 trp1-1 ade2-1 can1-100 Δbar1 RDN1::Probe(32)::URA3 SCC2::scc2-D730V::HYG
2, 5	BY4742	SG245.2	MATα his3Δ1 leu2Δ0 LYS2 MET15 ura3Δ0 SMC1::smc1-Q843Δ::HYG
	BY4742	SG97.6	MATα his3Δ1 leu2Δ0 LYS2 MET15 ura3Δ0 SCC2::scc2-4::HYG
	BY4742	SG98.6	MATα his3Δ1 leu2Δ0 LYS2 MET15 ura3Δ0 PDS5::pds5-2::HYG
	BY4742	BY4742	MATα his3Δ1 leu2Δ0 lys2Δ0 MET15 ura3Δ0
	BY4742	SG247.1	MATα his3Δ1 leu2Δ0 lys2Δ0 MET15 ura3Δ0 ECO1::eco1-W216G::HYG
	BY4742	SG246.1	MATα his3Δ1 leu2Δ0 LYS2 MET15 ura3Δ0 SCC2::scc2-D730V::HYG
6	BY4741	TB39.1	MATa his3Δ1 leu2Δ0 met15Δ0 ura3Δ0 NET1-GFP::HIS3
	BY4741	TB40.1	MATa his3Δ1 leu2Δ0 met15Δ0 ura3Δ0 SCC2::scc2-D730V::HYG NET1-GFP::HIS3
	BY4741	TB41.1	MATa his3Δ1 leu2Δ0 met15Δ0 ura3Δ0 ECO1::eco1-W216G::HYG NET1-GFP::HIS3
2	W303a	BH535.1	MATa ura3-1 leu2,3-112 his3-1 trp1-1 ade2-1 can1-100 Δbar1; Gcn4TAP:URA3
	W303a	BH536.1	MATa ura3-1 leu2,3-112 his3-1 trp1-1 ade2-1 can1-100 Δbar1 ECO1::eco1-W216G::HYG; Gcn4TAP:URA3
